# Supplementary material for: Cancer Cell Biomechanical Properties Accompany Tspan8-Dependent Cutaneous Melanoma Invasion
Source: MDPI journal article supplement (doi:10.3390/cancers16040694), 2024-02-06
Supplement: s1 [file s1]

## Supplementary Figures

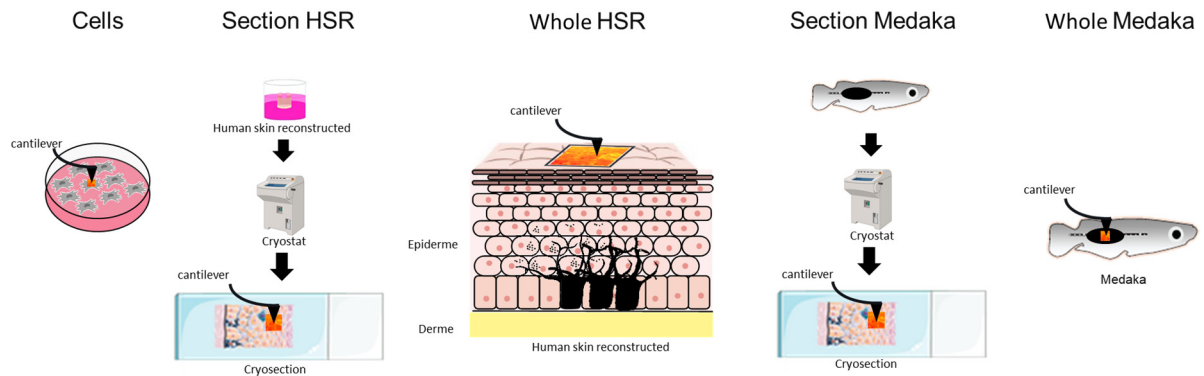

**Supplementary Figure S1.** Schematics of stiffness measurement in cultured-cells, sections from HSR, whole HSR, sections from Medaka skin and whole Medaka melanoma.

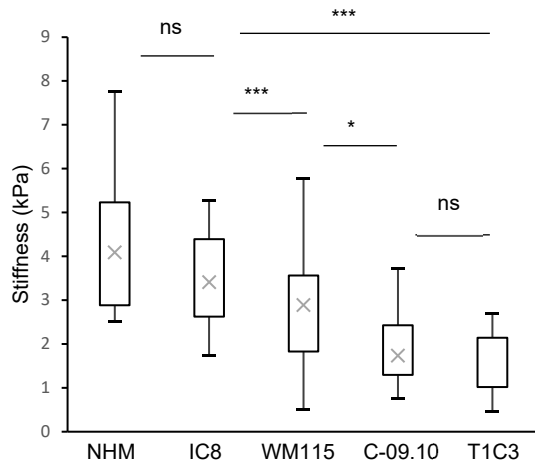

**Supplementary Figure S2.** Global measurement of melanoma cell stiffness during tumor progression with Normal Human Melanocytes (NHM), which corresponds to primary melanocytes, or IC8, WM115, C-09.10 and T1C3, which are non-invasive melanoma cells to highly invasive melanoma cells in the dermis respectively. \*  $p < 0.05$ ; \*\*\*  $p < 0.001$ ; ns non-significant.
