# Supplementary figures and images for: Cancer Cell Biomechanical Properties Accompany Tspan8-Dependent Cutaneous Melanoma Invasion
Source: MDPI journal article supplement (doi:10.3390/cancers16040694), 2024-02-06

Figure 2c

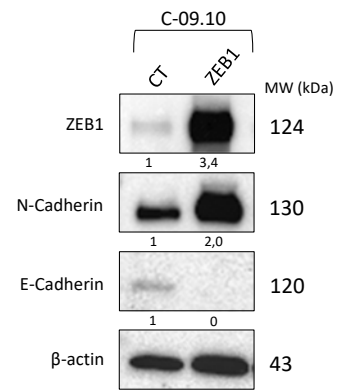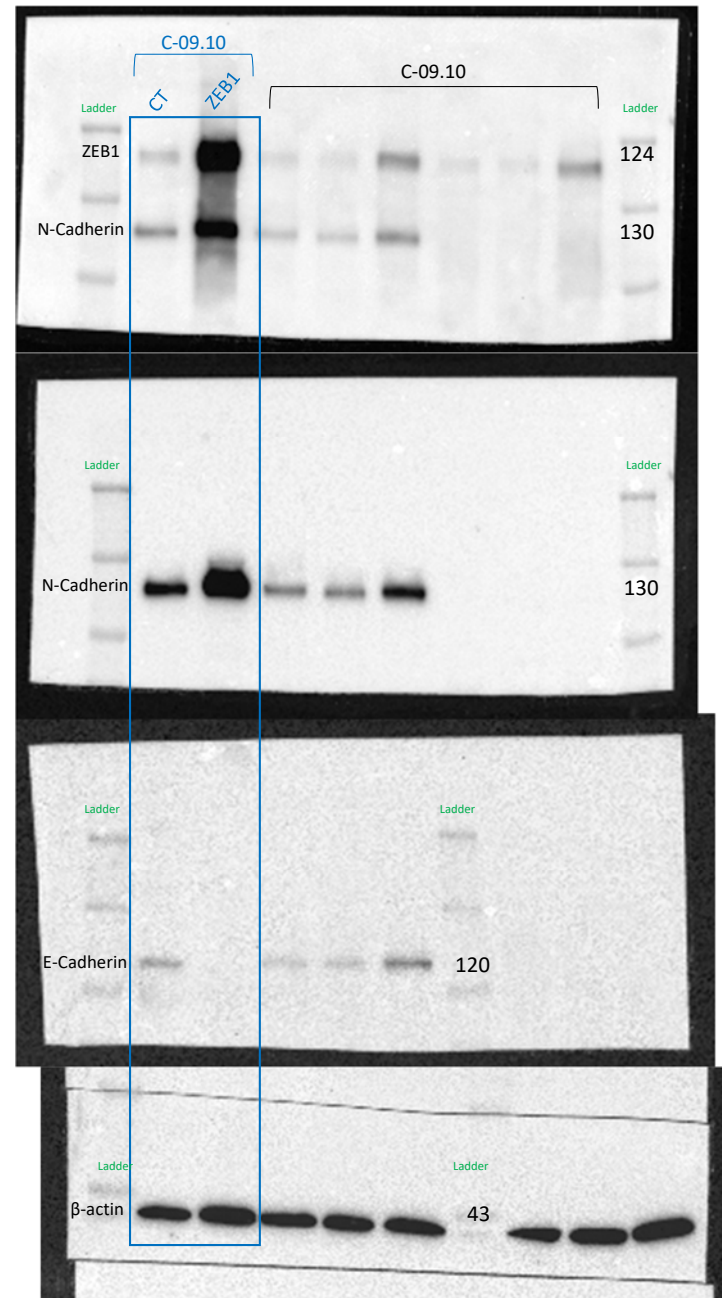

Figure 2e

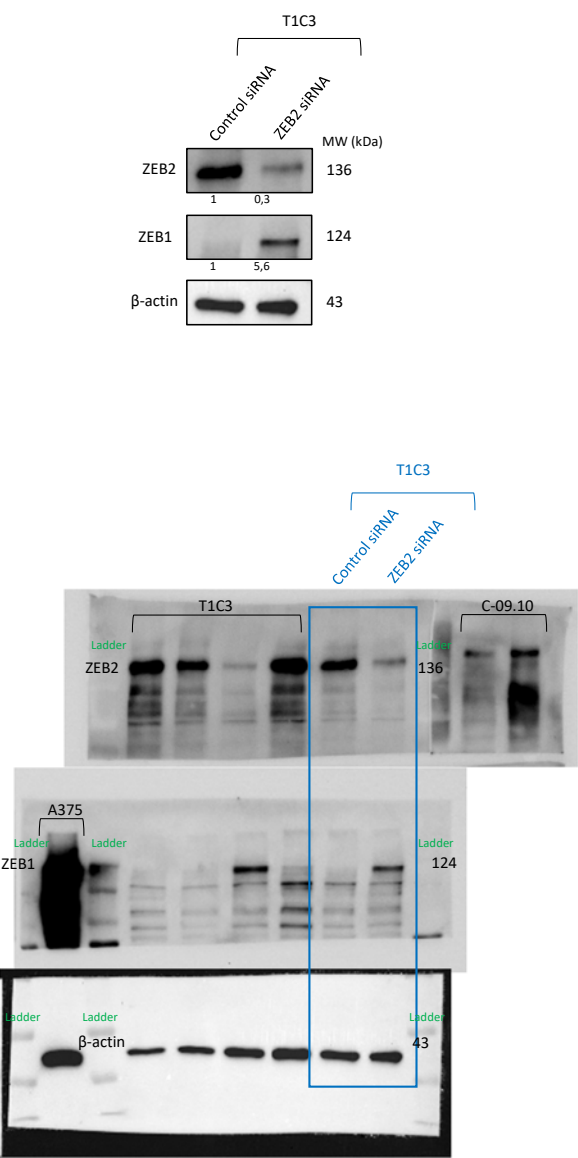

Figure 2e

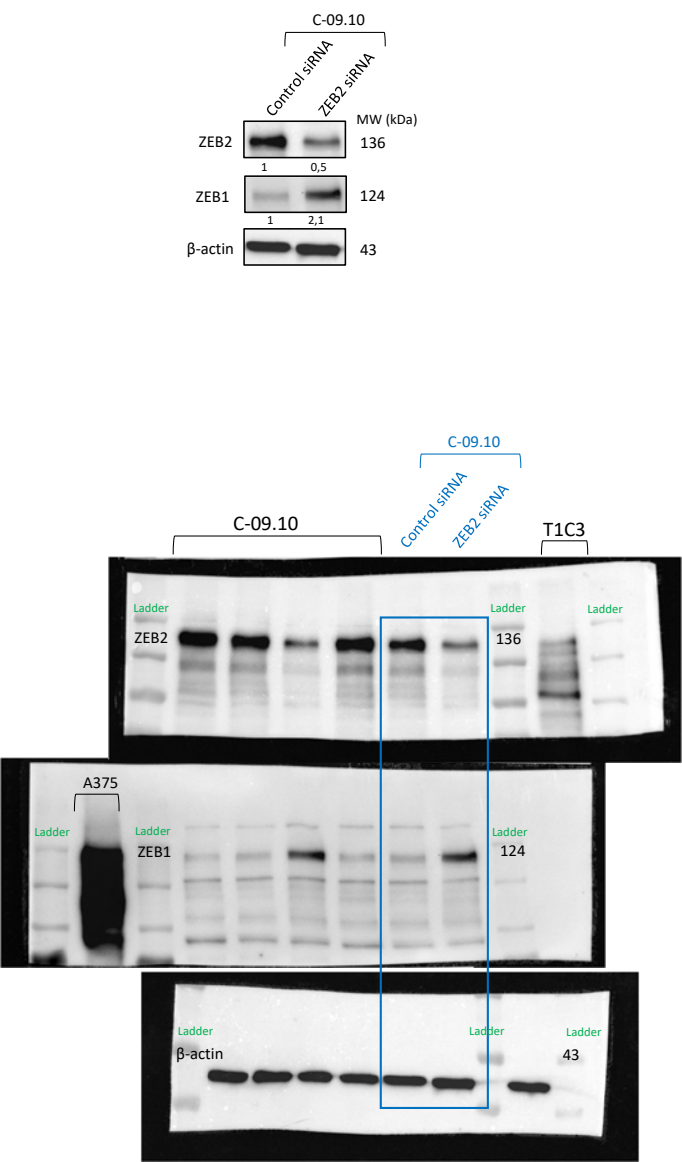

Figure 3b

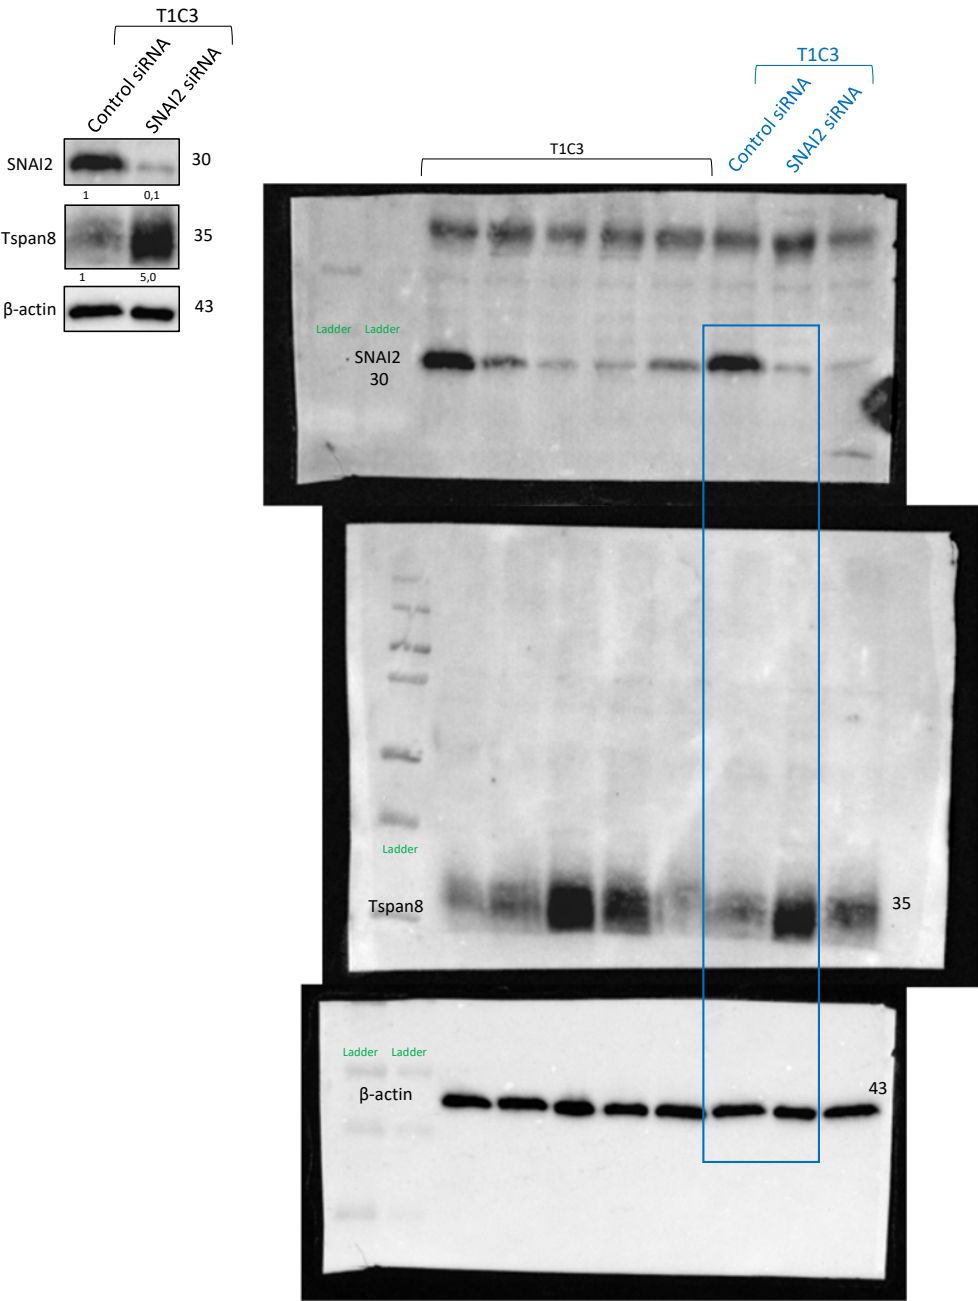

Figure 3b

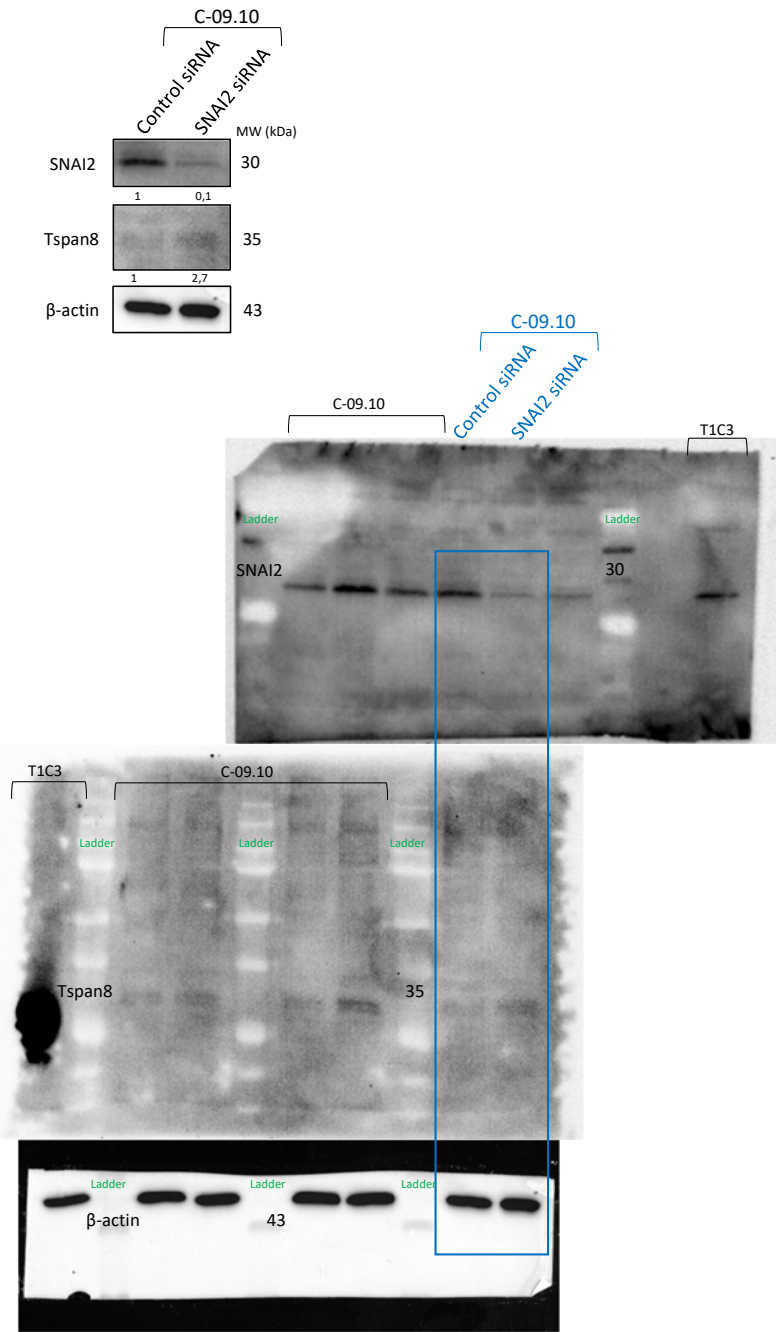

Figure 3b

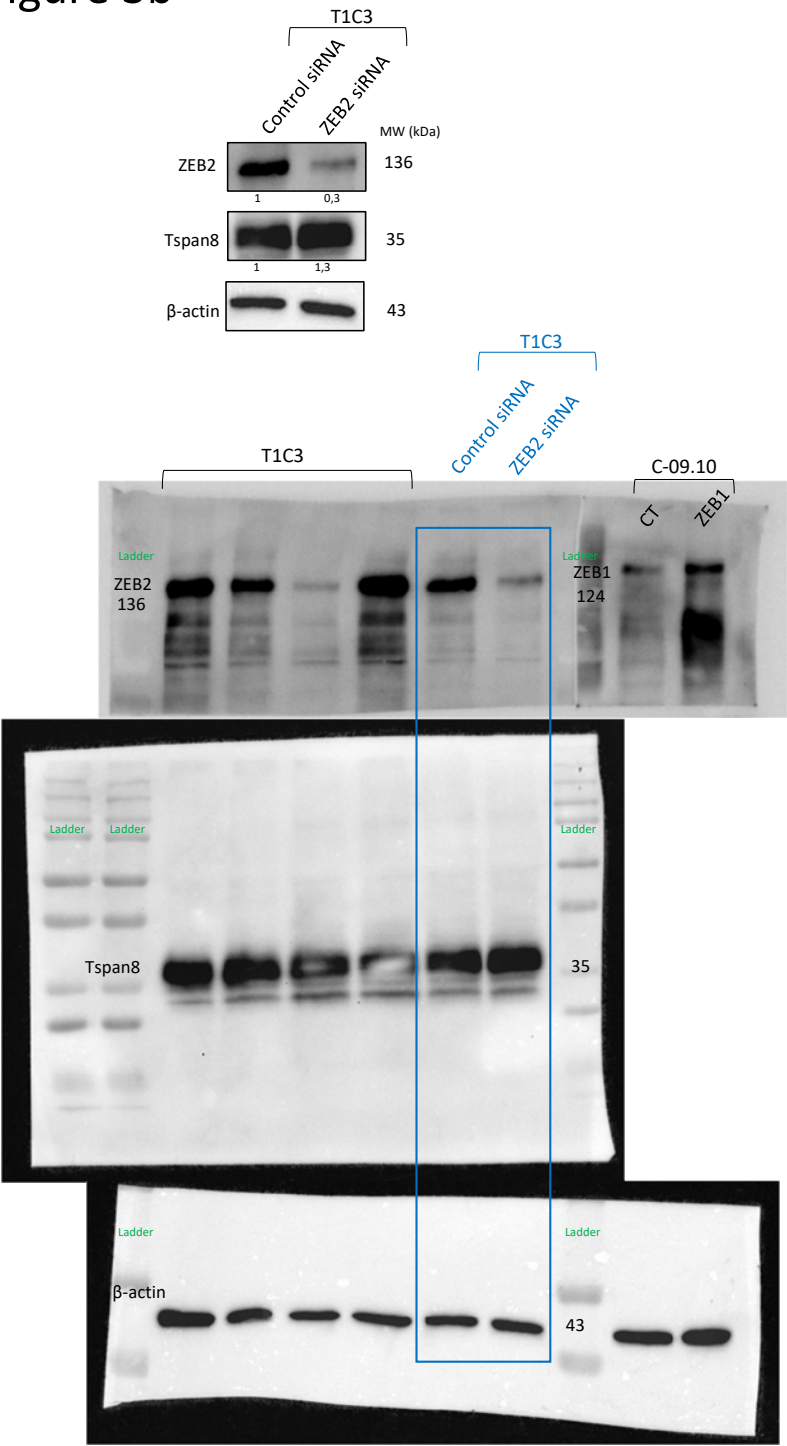

Figure 3b

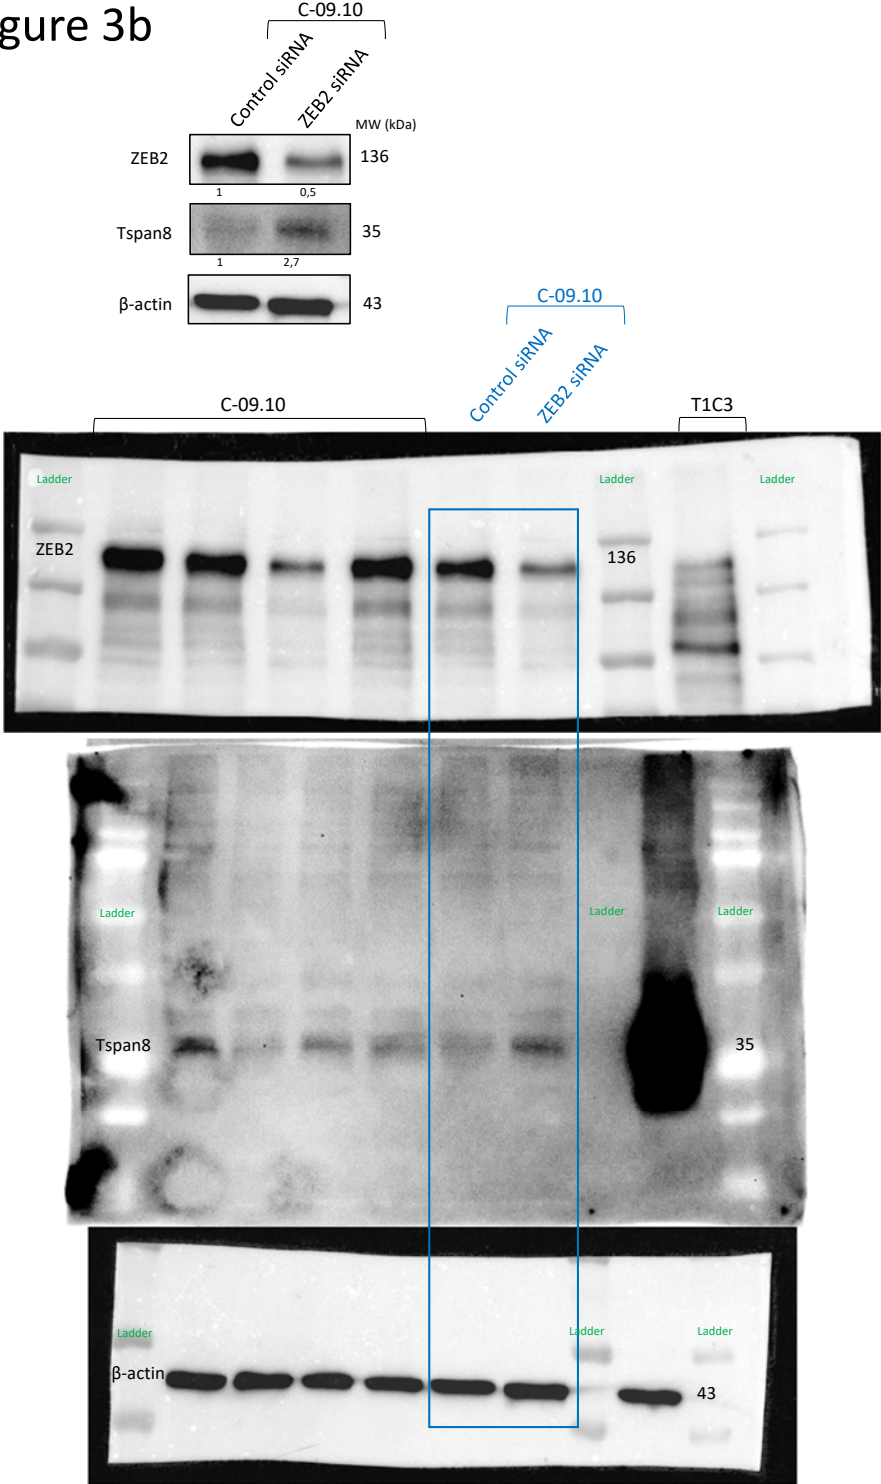

Figure 3c

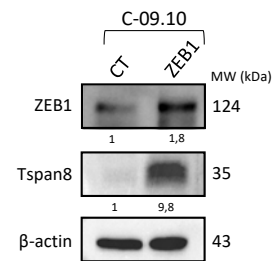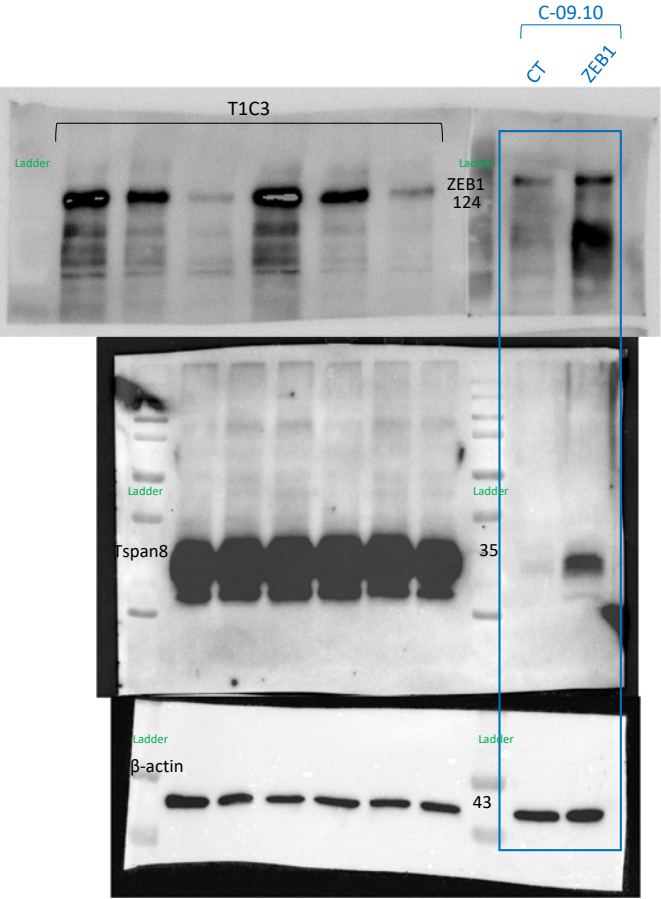

Figure 3e

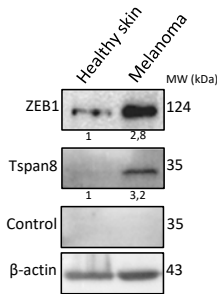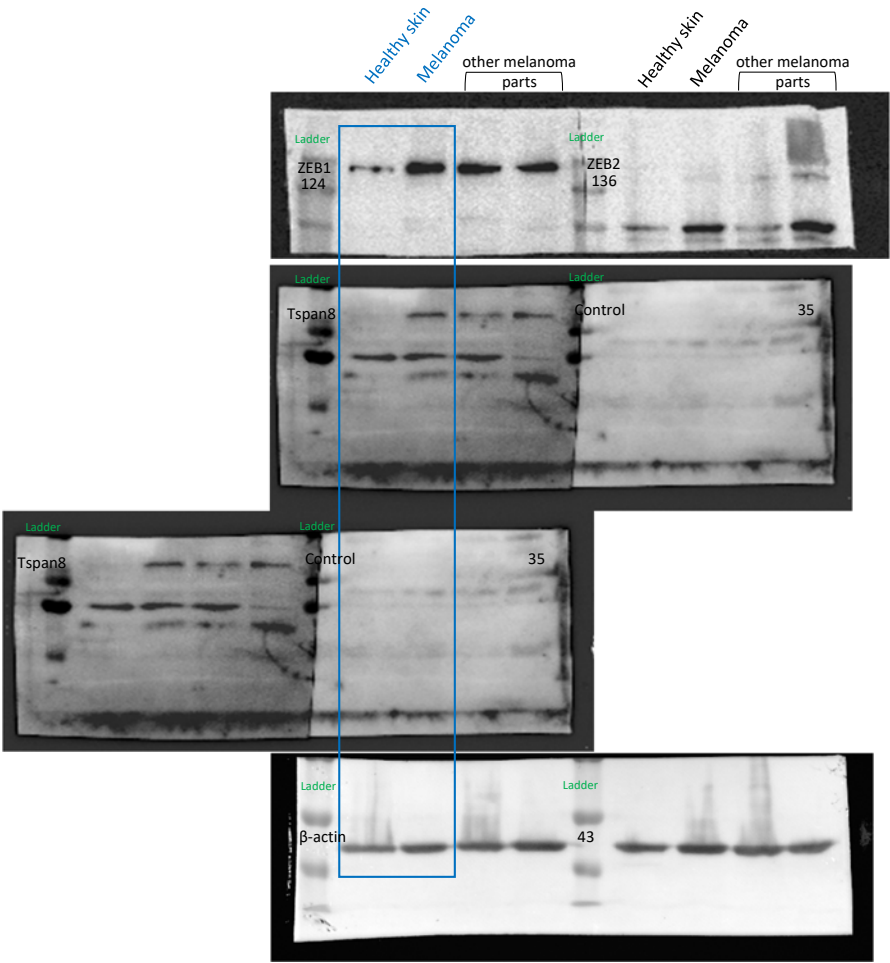

Figure 4a

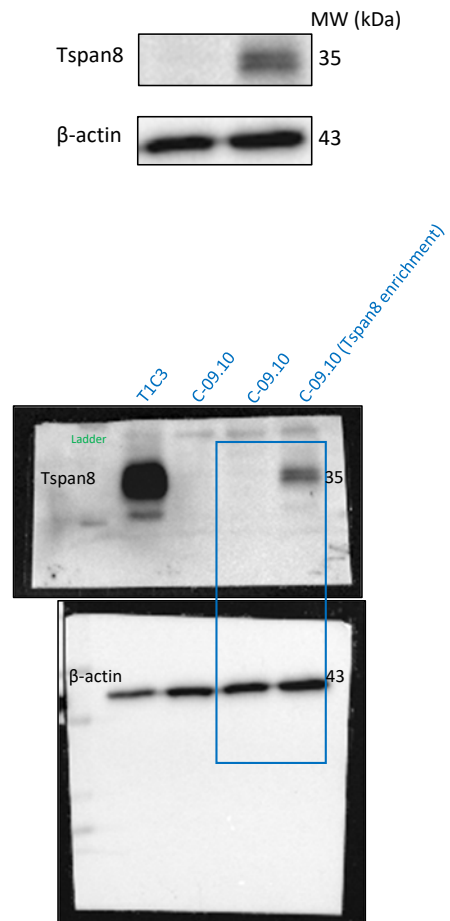

Supplement: s1 [file s1]
